# Supplementary material
Source: MDPI journal article supplement (https://www.mdpi.com/2072-4292/11/15/1783)
Supplement: s1 [file s1]

# The Effect of Droughts on Vegetation Condition in Germany: An Analysis Based on Two Decades of Satellite Earth Observation Time Series and Crop Yield Statistics

Sophie Reinermann <sup>1,\*</sup>, Ursula Gessner <sup>2</sup>, Sarah Asam <sup>2</sup>, Claudia Kuenzer <sup>1,2</sup>, and Stefan Dech <sup>1,2</sup>

<sup>1</sup> Department of Remote Sensing, Institute of Geography and Geology, University of Wuerzburg, 97074 Wuerzburg, Germany

<sup>2</sup> German Remote Sensing Data Center (DFD), Earth Observation Center (EOC), German Aerospace Center (DLR), 82234 Wessling, Germany

\* Correspondence: [sophie.reinermann@dlr.de](mailto:sophie.reinermann@dlr.de)

## Supplementary Material

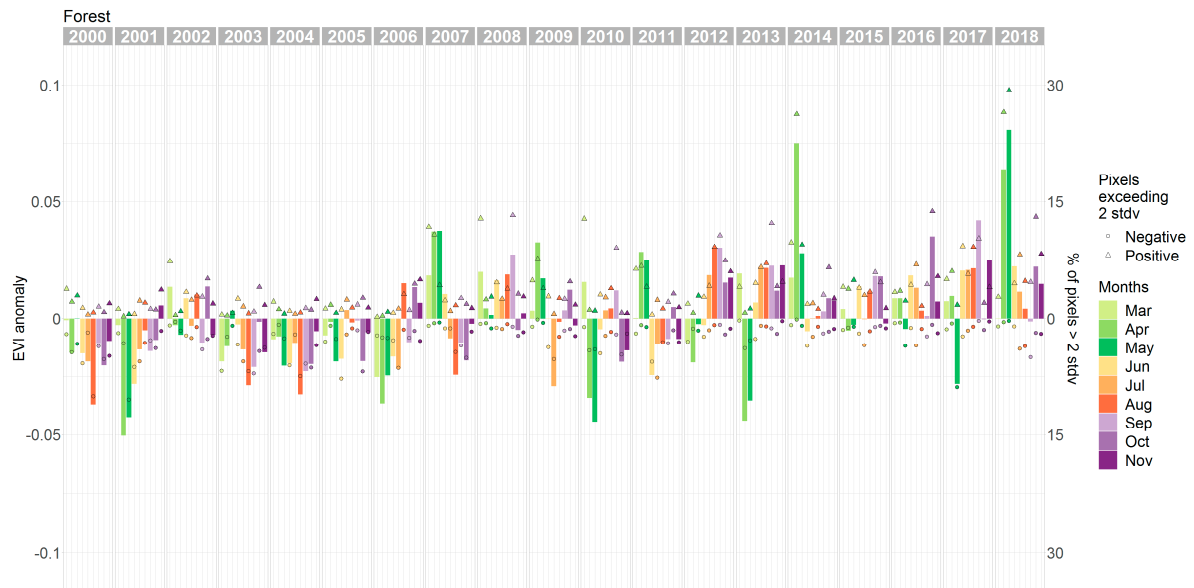

**Figure S1.** Monthly averaged EVI anomalies for forest and percentage of pixels with EVI deviances exceeding two standard deviations (pixel-based) positively and negatively per month for Germany for the years 2000–2018 for forest.

# Grassland

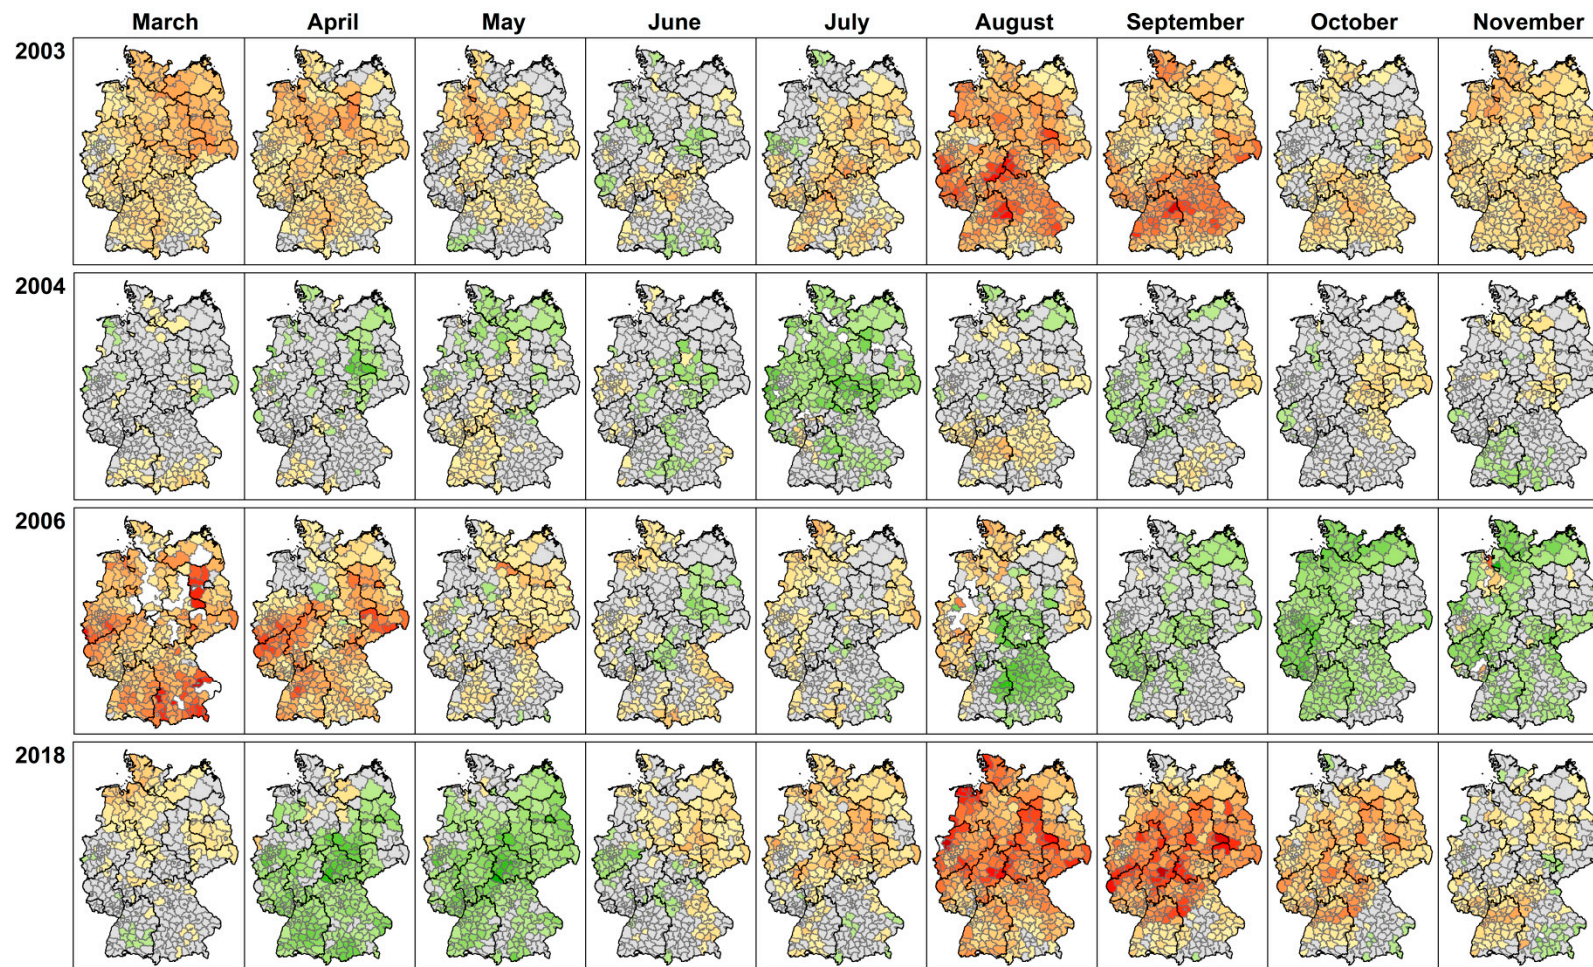

Deviation of monthly MODIS EVI from 18-year longterm median

-0.2      -0.02    +0.02      +0.21    no data

0    250    500 Km

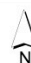

Coordinate System: WGS84  
Projection: Lambert Azimuthal Equal Area

**Figure S2.** County-level monthly EVI anomalies for the vegetation period of four years, including only grasslands. Counties comprising less than 10 valid pixels are excluded and are shown as no data class.

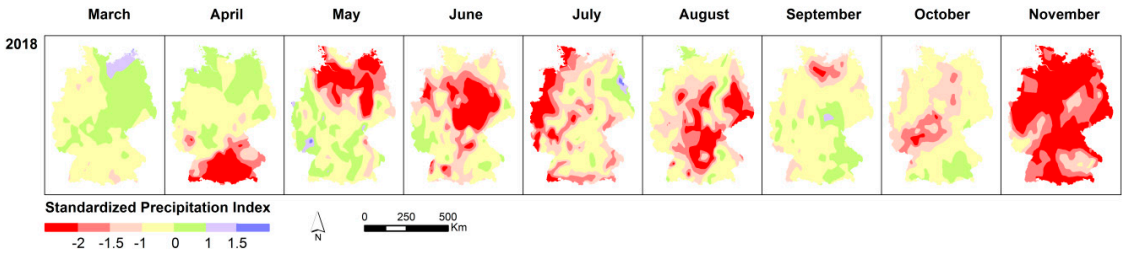

**Figure S3.** Monthly Standardized Precipitation Index (1 month) of Germany for 2018 provided by DWD (Deutscher Wetterdienst).
